# Supplementary material
Source: Springer Nature journal article supplement (https://www.springermedizin.de/resource/supplementary/13012_2013_735_MOESM2_ESM.pdf/9630554)
Supplement: MOESM2 [file 9630554]

*Emotional work.* Weak ties (those placed in the outer circle) did significantly lower amounts of emotional work than those placed in the inner ( $p < .0.001$ ) and middle circle ( $p < 0.001$ ). Those in the inner circle did significantly more work than those in the middle circle ( $p < 0.001$ )

*Practical work.* Weak ties performed significantly less practical work than those placed in the inner circle ( $p < 0.001$ ) but did not perform significantly differently from those placed within the middle circle of importance ( $p > 0.05$ ). In addition, those in the inner circle did significantly more work than those in the middle circle ( $p < 0.001$ )

*Illness Work.* Weak ties (those placed in the outer circle) undertook significantly lower amount of illness work than those placed in the inner ( $p < .0.001$ ) and middle circle ( $p < 0.01$ ). In addition, those in the inner circle did significantly more work than those in the middle circle ( $p < 0.001$ )
